# Supplementary material
Source: publisher figshare collection journal article supplement (https://gsajournals.figshare.com/articles/dataset/_/14531340)
Supplement: Supplementary file 1 [file 1]

Table S1. Details on the sequencing data used for this study

| Experiment      | Total # of reads | Mapped reads | Read Length | Availability | Species              | Tissue | Dev. Stage                  |
|-----------------|------------------|--------------|-------------|--------------|----------------------|--------|-----------------------------|
| PRO-cassava     | 89,453,388       | 37,764,651   | 100bp       | GSE114758    | Manihot esculenta    | Shoots | 6 weeks (tissue culture)    |
| PRO-maize       | 33,503,263       | 3,671,229    | 75bp        | GSE114758    | Zea mays             | Shoots | 9 day-old seedlings         |
| GRO-maize       | 109,191,918      | 18,022,061   | 50bp        | SRR1121678/9 | Zea mays             | Shoots | 8 day-old seedlings         |
| GRO-arabidopsis | 45,343,111       | 7,670,626    | 75bp        | SRR3647034   | Arabidopsis thaliana | Shoots | 6 day-old seedlings         |
| Liu et al.      | 46,366,202       | 4,115,907    | 50bp        | GSE95301     | Arabidopsis thaliana | Shoots | 10 day-old seedlings        |
| Zhu et al.      | 225,727,047      | 14,069,753   | 150bp       | GSE117014    | Arabidopsis thaliana | Shoots | 16 day-old (tissue culture) |
